# Supplementary material for: OH populations and temperatures from simultaneous spectroscopic observations of 25 bands
Source: Copernicus journal article supplement (doi:10.5194/acp-15-3647-2015), 2015-04-01
Supplement: Supplementary file 1 [file acp-15-3647-2015-supplement.zip]

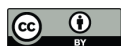

## *Supplement of*

# **OH populations and temperatures from simultaneous spectroscopic observations of 25 bands**

**S. Noll et al.**

*Correspondence to:* S. Noll ([stefan.noll@uibk.ac.at](mailto:stefan.noll@uibk.ac.at))

- [acp-15-3647-2015-supplement-cover-letter.pdf](#)
- [acp-2014-895-plotdata](#)
  - [fig04.dat](#)
  - [fig06\\_bands.dat](#)
  - [fig06\\_vp.dat](#)
  - [fig07\\_bands.dat](#)
  - [fig07\\_vp.dat](#)
  - [fig08\\_Trot.dat](#)
  - [fig08\\_Tvib.dat](#)
  - [fig08\\_relint.dat](#)
  - [fig09.dat](#)
  - [fig10.dat](#)
  - [fig11.dat](#)
  - [fig12.dat](#)
  - [fig13.dat](#)
